# Supplementary material for: Methionyl-tRNA Synthetase Regulates Lifespan in Drosophila
Source: PubMed Central journal article supplement — Mol Cells. 2020 Jan 14;43(3):304–11. doi: 10.14348/molcells.2019.0273 (PMC7103878; doi:10.14348/molcells.2019.0273), 2020-01-14
Supplement: MolCe-43-304_Supple.pdf [file MolCe-43-304_Supple.pdf]

Supplementary Table S1. PCR primers used in this study

| PCR primer                | Product size (bp) | Primer sequence (5' to 3') |
|---------------------------|-------------------|----------------------------|
| Attacin A                 | 187               | F: ACAATCTGGATGCCAAGGTC    |
|                           |                   | R: GGCGATGACCAGAGATTAGC    |
| Cecropin A                | 190               | F: CTCTCATTCTGGCCATCACC    |
|                           |                   | R: CTTGTTGAGCGATTCCCAGT    |
| Defensin                  | 182               | F: GTGGATCCAATTCCAGAGGA    |
|                           |                   | R: GCCTTGTCGTTGCAGTAG      |
| Diptericin A              | 186               | F: ACCGCAGTACCCACTCAATC    |
|                           |                   | R: ACTTTCCAGCTCGGTTCTGA    |
| Drosocin                  | 151               | F: CGTTTTCTGCTGCTTGC       |
|                           |                   | R: GGCAGCTTGAGTCAGGTGAT    |
| Drosomycin                | 201               | F: GTACTTGTTCCGCCCTCTTCG   |
|                           |                   | R: ATTTAGCATCCTTCGCACCA    |
| Metchnikowin              | 160               | F: CCACCGAGCTAAGATGCAA     |
|                           |                   | R: ACCCGGTCTTGGTTGGTTAG    |
| Methionyl tRNA synthetase | 178               | F: ATGTGTGGTTTGATGCTCCA    |
|                           |                   | R: TGTTGATGGCCAGTAGGACA    |
| RP49                      | 122               | F: AGGGTATCGACAACAGAGTG    |
|                           |                   | R: CACCAGGA ACTTCTTGAATC   |
